# Supplementary material for: Gadolinium complexes of monophosphinic acid DOTA derivatives conjugated to cyclodextrin scaffolds: efficient MRI contrast agents for higher magnetic fields
Source: Royal Society of Chemistry journal article supplement (doi:10.1039/c2dt30858d), 2012-01-01
Supplement: c2dt30858d.pdf [file c2dt30858d.pdf]

Electronic Supplementary Information for

## Gadolinium Complexes of Monophosphinic Acid DOTA Derivative Conjugated to Cyclodextrin Scaffolds: Efficient MRI Contrast Agents for Higher Magnetic Fields

Zuzana Kotková, Lothar Helm, Jan Kotek, Petr Hermann and Ivan Lukeš

### Table of contents

Fig. S1. SE-HPLC chromatograms of products and reaction mixtures from conjugation reactions.

Fig. S2.  $^1\text{H}$  NMR spectra of the CD-DO3AP<sup>NCS</sup> conjugates.

Fig. S3. MALDI-MS spectra of conjugate complexes.

Fig. S4. Suggested solution structure of the L<sub>7</sub>-β-CD conjugate.

Comparison of steric crowding of conjugates with α and β-cyclodextrins.

Fig. S5.  $^1\text{H}$  and  $^{31}\text{P}\{^1\text{H}\}$  NMR spectra of (EuL)<sub>6</sub>-α-CD.

Fig. S6.  $^1\text{H}$  NMRD profiles of the (Gd/LaL)<sub>6</sub>-α-CD conjugates.

Table S1. MALDI-MS data for (LaL)<sub>6</sub>-α-CD.

Table S2. MALDI MS data for (YL)<sub>7</sub>-β-CD.

Table S3. Luminescence lifetimes of the (Eu/TbL)<sub>7</sub>-β-CD complexes and related compounds.

Table S4.  $^{17}\text{O}$  NMR relaxometric data of (GdL)<sub>6</sub>-α-CD and (GdL)<sub>7</sub>-β-CD.

Table S5.  $^1\text{H}$  NMR relaxivities of (GdL)<sub>6</sub>-α-CD and (GdL)<sub>7</sub>-β-CD.

Table S6.  $^1\text{H}$  NMR relaxivities of (GdL)<sub>6</sub>-α-CD and (GdL)<sub>7</sub>-β-CD measured at clinical fields.

Set of equations used for fitting of relaxometric data.

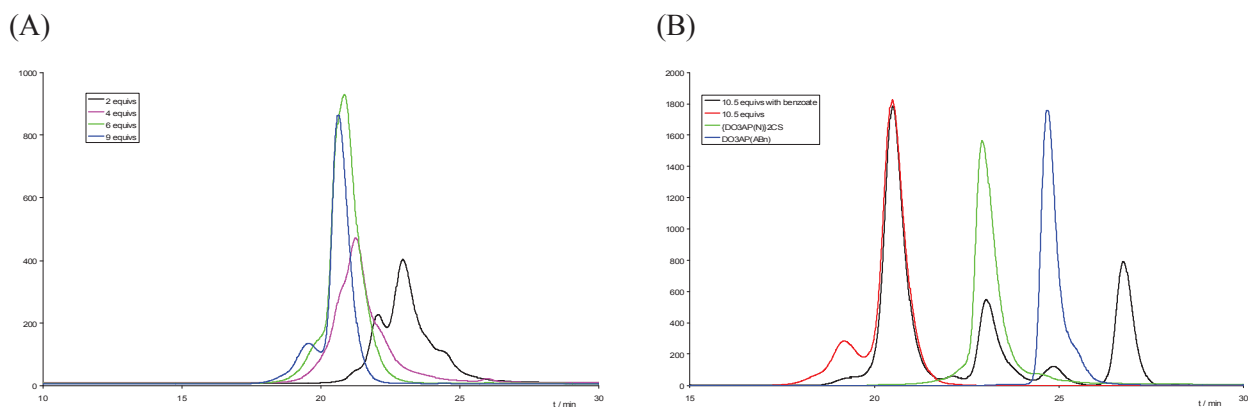

Fig. S1. (A) SE-HPLC chromatograms of products from reaction of  $\alpha$ -CD-(NH<sub>2</sub>)<sub>6</sub> with 2 (black), 4 (magenta), 6 (green) and 9 equivs of DO3AP<sup>NCS</sup>; the reaction mixtures were worked-up by ultrafiltration using membrane with 1 kDa cut-off. (B) Comparison of SE-HPLC chromatograms of product from reaction between  $\beta$ -CD-(NH<sub>2</sub>)<sub>7</sub> and 10.5 equivs of DO3AP<sup>NCS</sup> (separated by ultrafiltration using 3 kDa membrane, red) and reaction mixture of  $\beta$ -CD-(NH<sub>2</sub>)<sub>7</sub> with 10.5 equivs of DO3AP<sup>NCS</sup> in presence of 20 equivs of benzoate (black). The chromatograms of DO3AP<sup>ABn</sup> (blue) and the ditopic byproduct (DO3AP<sup>N</sup>)<sub>2</sub>CS (green) are shown for the comparison. The last peak (~27 min) corresponds to the benzoic acid.

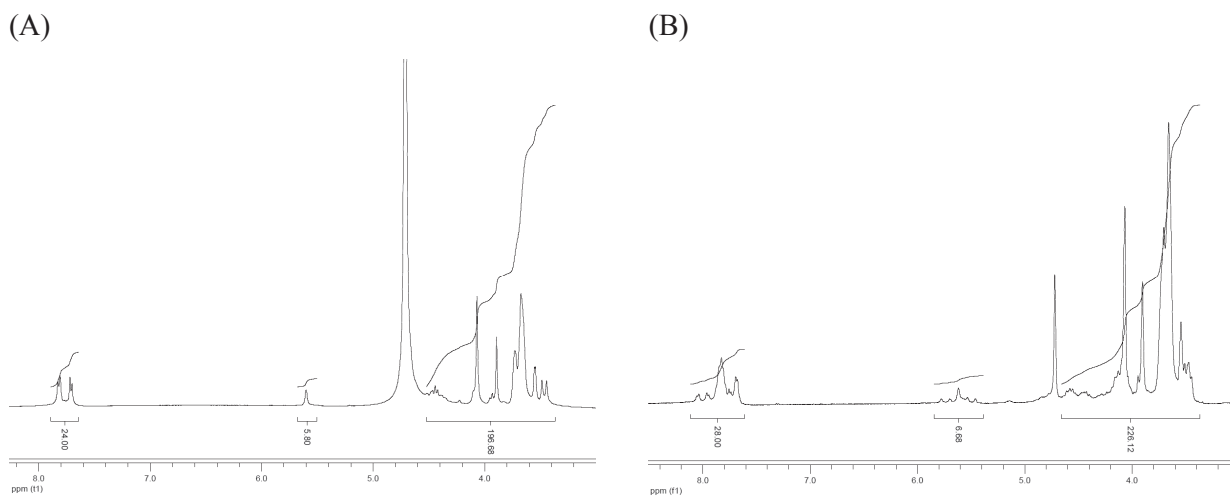

Fig. S2. <sup>1</sup>H NMR spectra of the CD-DO3AP<sup>NCS</sup> conjugates. (A) L<sub>6</sub>- $\alpha$ -CD; (B) L<sub>7</sub>- $\beta$ -CD.

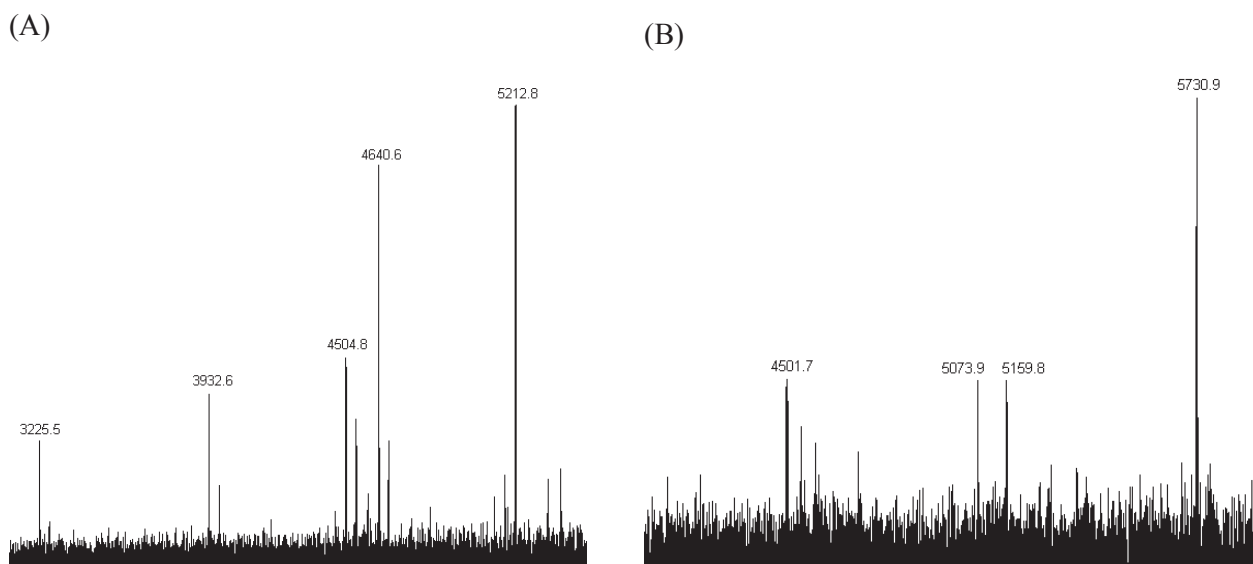

Fig. S3. MALDI-MS spectra of  $(LaL)_6-\alpha-CD$  (A) and  $(YL)_7-\beta-CD$  (B).

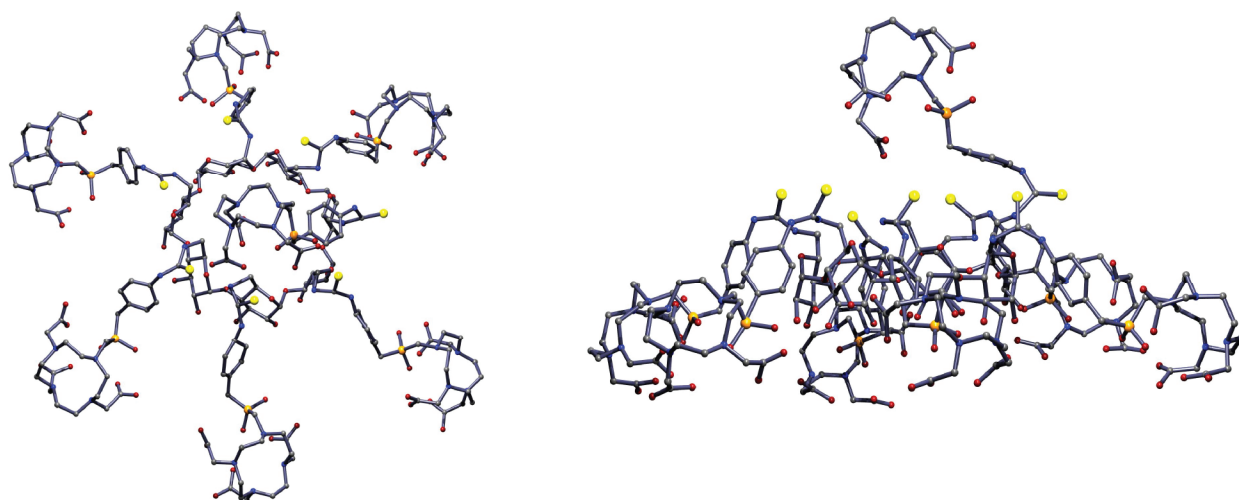

Fig. S4. Suggested solution structure of the  $L_7-\beta-CD$  conjugate.

### Comparison of steric crowding of conjugates with $\alpha$ and $\beta$ -cyclodextrins

Let's suggest that cyclodextrin is regular cylindrical molecule. For such a case, its circumference is given by:

$$circ_{CD} = n \cdot d_{SU},$$

where  $n$  is a number of sugar units and  $d_{SU}$  is mean length of one sugar unit.

The diameter of the cyclodextrin molecule is given by:

$$d_{CD} = circ_{CD} / \pi$$

Let's suggest that conjugate has disc geometry. Thus, after conjugation, the diameter is increased by two mean lengths of complex unit,  $d_{complex}$ :

$$d_{conjug} = d_{CD} + 2 \cdot d_{complex}$$

The circumference of whole conjugate disc is than:

$$circ_{conjug} = \pi \cdot d_{conjug} = \pi \cdot (d_{CD} + 2 \cdot d_{complex}) = circ_{CD} + 2 \cdot \pi \cdot d_{complex} = n \cdot d_{SU} + 2 \cdot \pi \cdot d_{complex}$$

The part of circumference available for one complex unit is than:

$$circ_{conjug} / n = d_{SU} + 2 \cdot \pi \cdot d_{complex} / n$$

When one is assuming larger  $n+1$  cyclooligomer, it gives:

$$circ_{conjug} / (n+1) = d_{SU} + 2 \cdot \pi \cdot d_{complex} / (n+1),$$

i.e. part of circumference available for complex is decreasing with increasing number of sugar units, and therefore, steric crowding in the disc plane increases. E.g., for typical lengths in the cyclodextrin–DOTA-like conjugate case, the distances are  $d_{SU} \sim 4.3 \text{ \AA}$  and  $d_{complex} \sim 6 \text{ \AA}$ , it gives  $circ_{conjug} \sim 10.6$  and  $9.7 \text{ \AA}$ , respectively, for  $\alpha$ - and  $\beta$ -cyclodextrin conjugates.

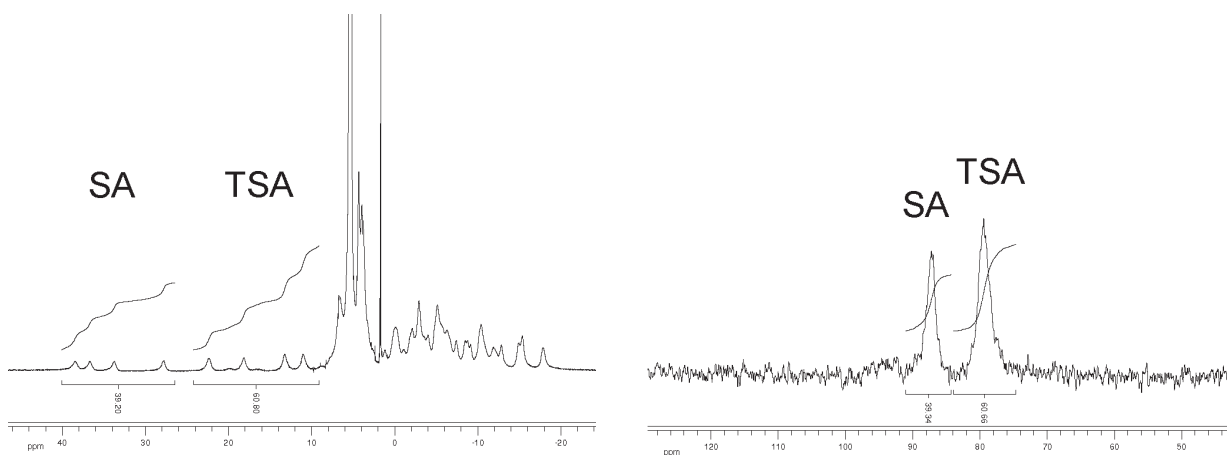

Fig. S5.  $^1\text{H}$  and  $^{31}\text{P}\{^1\text{H}\}$  NMR spectra of  $(\text{EuL})_6\text{-}\alpha\text{-CD}$  (25 °C).

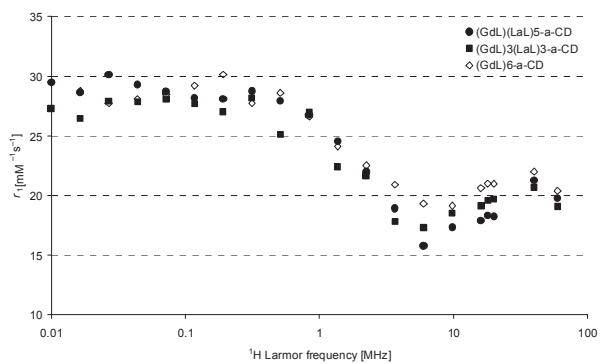

Fig. S6.  $^1\text{H}$  NMRD profiles of the  $(\text{GdL})_6\text{-}\alpha\text{-CD}$  conjugate and the magnetically diluted species,  $(\text{GdL})(\text{LaL})_5\text{-}\alpha\text{-CD}$  and  $(\text{GdL})_3(\text{LaL})_3\text{-}\alpha\text{-CD}$ , acquired at 25 °C (relaxivity calculated per one  $\text{Gd}^{\text{III}}$  ion).

Table S1. MALDI-MS data for (LaL)<sub>6</sub>-α-CD.

| Found <i>m/z</i> | Ion <sup>a</sup>                              | Formula                                                                                                                      | Calculated <i>m/z</i> |
|------------------|-----------------------------------------------|------------------------------------------------------------------------------------------------------------------------------|-----------------------|
| 5212.8           | [(LaL) <sub>6</sub> -α-CD+7H] <sup>+</sup>    | C <sub>174</sub> H <sub>253</sub> La <sub>6</sub> N <sub>36</sub> O <sub>72</sub> P <sub>6</sub> S <sub>6</sub> <sup>+</sup> | 5211.84 (100.0 %)     |
|                  |                                               |                                                                                                                              | 5210.84 (86.3 %)      |
|                  |                                               |                                                                                                                              | 5212.85 (52.2 %)      |
| 4640.6           | [(LaL) <sub>5</sub> -α-CD+La+3H] <sup>+</sup> | C <sub>151</sub> H <sub>219</sub> La <sub>6</sub> N <sub>31</sub> O <sub>64</sub> P <sub>5</sub> S <sub>5</sub> <sup>+</sup> | 4639.65 (100.0 %)     |
|                  |                                               |                                                                                                                              | 4640.66 (85.2 %)      |
|                  |                                               |                                                                                                                              | 4641.66 (58.9 %)      |
| 4504.8           | [(LaL) <sub>5</sub> -α-CD+6H] <sup>+</sup>    | C <sub>151</sub> H <sub>222</sub> La <sub>5</sub> N <sub>31</sub> O <sub>64</sub> P <sub>5</sub> S <sub>5</sub> <sup>+</sup> | 4503.77 (100.0 %)     |
|                  |                                               |                                                                                                                              | 4504.77 (99.7 %)      |
|                  |                                               |                                                                                                                              | 4502.77 (58.4 %)      |
| 3932.6           | [(LaL) <sub>4</sub> -α-CD+La+2H] <sup>+</sup> | C <sub>128</sub> H <sub>188</sub> La <sub>5</sub> N <sub>26</sub> O <sub>56</sub> P <sub>4</sub> S <sub>4</sub> <sup>+</sup> | 3932.58 (100.0 %)     |
|                  |                                               |                                                                                                                              | 3933.59 (74.6 %)      |
|                  |                                               |                                                                                                                              | 3931.58 (66.1 %)      |
| 3225.5           | [(LaL) <sub>3</sub> -α-CD+La+H] <sup>+</sup>  | C <sub>105</sub> H <sub>157</sub> La <sub>4</sub> N <sub>21</sub> O <sub>48</sub> P <sub>3</sub> S <sub>3</sub> <sup>+</sup> | 3225.52 (100.0 %)     |
|                  |                                               |                                                                                                                              | 3224.51 (85.2 %)      |
|                  |                                               |                                                                                                                              | 3226.52 (66.6 %)      |

<sup>a</sup> As the complexing unit of DO3AP<sup>ABn</sup> is four-valent acid, the (LaL) complex unit in the formulas above means the fully deprotonated species with one negative charge, *i.e.* (LaL)<sup>-</sup>.

Table S2. MALDI MS data for (YL)<sub>7</sub>-β-CD.

| Found <i>m/z</i> | Ion <sup>a</sup>                            | Formula                                                                                                                     | Calculated <i>m/z</i> |
|------------------|---------------------------------------------|-----------------------------------------------------------------------------------------------------------------------------|-----------------------|
| 5730.9           | [(YL) <sub>7</sub> -β-CD+8H] <sup>+</sup>   | C <sub>203</sub> H <sub>295</sub> N <sub>42</sub> O <sub>84</sub> P <sub>7</sub> S <sub>7</sub> Y <sub>7</sub> <sup>+</sup> | 5730.98 (100.0%)      |
|                  |                                             |                                                                                                                             | 5729.98 (99.0%)       |
|                  |                                             |                                                                                                                             | 5728.98 (82.2%)       |
| 5159.8           | [(YL) <sub>6</sub> -β-CD+Y+4H] <sup>+</sup> | C <sub>180</sub> H <sub>261</sub> N <sub>37</sub> O <sub>76</sub> P <sub>6</sub> S <sub>6</sub> Y <sub>7</sub> <sup>+</sup> | 5158.79 (100.0%)      |
|                  |                                             |                                                                                                                             | 5157.79 (81.3%)       |
|                  |                                             |                                                                                                                             | 5159.80 (53.8%)       |
| 5073.9           | [(YL) <sub>6</sub> -β-CD+7H] <sup>+</sup>   | C <sub>180</sub> H <sub>264</sub> N <sub>37</sub> O <sub>76</sub> P <sub>6</sub> S <sub>6</sub> Y <sub>6</sub> <sup>+</sup> | 5072.91 (100.0%)      |
|                  |                                             |                                                                                                                             | 5071.91 (88.9%)       |
|                  |                                             |                                                                                                                             | 5073.91 (87.0%)       |
| 4501.7           | [(YL) <sub>5</sub> -β-CD+Y+3H] <sup>+</sup> | C <sub>157</sub> H <sub>230</sub> N <sub>32</sub> O <sub>68</sub> P <sub>5</sub> S <sub>5</sub> Y <sub>6</sub> <sup>+</sup> | 4501.72 (100.0%)      |
|                  |                                             |                                                                                                                             | 4500.72 (94.5%)       |
|                  |                                             |                                                                                                                             | 4499.72 (52.8%)       |

<sup>a</sup> As the complexing unit of DO3AP<sup>ABn</sup> is four-valent acid, the (YL) complex unit in the formulas above means the fully deprotonated species with one negative charge, *i.e.* (YL)<sup>-</sup>.

Table S3. Luminescence lifetimes of the (Eu/TbL)<sub>7</sub>-β-CD complexes and related compounds (Eu: λ<sub>ex</sub> 396 nm, λ<sub>em</sub> 595 and 616 nm; Tb: λ<sub>ex</sub> 353 nm, λ<sub>em</sub> 488 and 544 nm).

| Compound                                | τ(H <sub>2</sub> O) / μs | τ(D <sub>2</sub> O) / μs | <i>q</i> <sup>a</sup> | Reference           |
|-----------------------------------------|--------------------------|--------------------------|-----------------------|---------------------|
| (EuL) <sub>7</sub> -β-CD                | 815                      | 2240                     | 0.82/0.64             | this work           |
| (TbL) <sub>7</sub> -β-CD                | 1750                     | 2730                     | 0.86/0.73             | this work           |
| Eu <sup>III</sup> -DO3AP <sup>ABn</sup> | 680                      | 2110                     | 1.05/0.90             | this work           |
| Tb <sup>III</sup> -DO3AP <sup>ABn</sup> | 1620                     | 2850                     | 1.12/1.03             | this work           |
| Eu <sup>III</sup> -DOTA                 | 625                      | 1890                     | 1.12/0.98             | ref. <sup>[1]</sup> |
| Tb <sup>III</sup> -DOTA                 | 1515                     | 2560                     | 1.13/1.05             | ref. <sup>[1]</sup> |

<sup>a</sup> Hydration numbers calculated according to Horrocks<sup>[2]</sup>/Parker<sup>[1]</sup> equations.

Table S4.  $^{17}\text{O}$  NMR relaxometric data of  $(\text{GdL})_6\text{-}\alpha\text{-CD}$  and  $(\text{GdL})_7\text{-}\beta\text{-CD}$  at 54.3 MHz (*i.e.*  $^1\text{H}$  400 MHz, 9.40 T).

| $T / \text{K}$ | $(\text{GdL})_6\text{-}\alpha\text{-CD}$ |                                      |                                             | $(\text{GdL})_7\text{-}\beta\text{-CD}$ |                                      |                                             |
|----------------|------------------------------------------|--------------------------------------|---------------------------------------------|-----------------------------------------|--------------------------------------|---------------------------------------------|
|                | $r_1 / \text{s}^{-1} \text{mM}^{-1}$     | $r_2 / \text{s}^{-1} \text{mM}^{-1}$ | $\omega / \text{rad s}^{-1} \text{mM}^{-1}$ | $r_1 / \text{s}^{-1} \text{mM}^{-1}$    | $r_2 / \text{s}^{-1} \text{mM}^{-1}$ | $\omega / \text{rad s}^{-1} \text{mM}^{-1}$ |
| 278.2          | 2.554                                    | 15.37                                | -11.14                                      | 2.717                                   | 18.98                                | -13.12                                      |
| 283.2          | 2.217                                    | 16.38                                | -13.25                                      | 2.617                                   | 17.55                                | -14.31                                      |
| 288.2          | 2.160                                    | 14.92                                | -12.25                                      | 2.278                                   | 16.20                                | -15.18                                      |
| 298.0          | 1.618                                    | 11.72                                | -13.84                                      | 1.756                                   | 12.15                                | -15.37                                      |
| 306.7          | 1.180                                    | 8.786                                | -12.73                                      | 1.375                                   | 8.494                                | -15.37                                      |
| 316.2          | 0.981                                    | 5.821                                | -12.00                                      | 1.095                                   | 5.748                                | -14.11                                      |
| 326.2          | 0.734                                    | 3.965                                | -11.23                                      | 0.826                                   | 3.895                                | -13.29                                      |
| 336.2          | 0.560                                    | 2.436                                | -10.76                                      | 0.637                                   | 2.667                                | -12.67                                      |
| 345.2          | 0.429                                    | 1.632                                | -10.21                                      | 0.488                                   | 1.883                                | -11.61                                      |
| 355.2          | 0.331                                    | 1.127                                | -9.681                                      | 0.367                                   | 1.345                                | -11.16                                      |

Table S5.  $^1\text{H}$  NMR relaxivities of  $(\text{GdL})_6\text{-}\alpha\text{-CD}$  and  $(\text{GdL})_7\text{-}\beta\text{-CD}$ .

| $B / \text{MHz}$ | $r_1 / \text{s}^{-1} \text{mM}^{-1}$     |         |                                         |         |         |
|------------------|------------------------------------------|---------|-----------------------------------------|---------|---------|
|                  | $(\text{GdL})_6\text{-}\alpha\text{-CD}$ |         | $(\text{GdL})_7\text{-}\beta\text{-CD}$ |         |         |
|                  | 298.2 K                                  | 310.2 K | $B / \text{MHz}$                        | 298.2 K | 310.2 K |
| 0.0100           | 29.46                                    | 22.38   | 0.0100                                  | 28.50   | 22.37   |
| 0.0164           | 28.74                                    | 23.02   | 0.0147                                  | 28.16   | 22.60   |
| 0.0267           | 27.90                                    | 23.63   | 0.0214                                  | 28.04   | 22.73   |
| 0.0438           | 28.07                                    | 23.54   | 0.0314                                  | 27.93   | 22.38   |
| 0.0716           | 28.47                                    | 23.01   | 0.0460                                  | 28.64   | 22.58   |
| 0.117            | 29.18                                    | 23.02   | 0.0674                                  | 28.67   | 22.61   |
| 0.191            | 30.14                                    | 23.27   | 0.0985                                  | 28.17   | 22.23   |
| 0.313            | 28.72                                    | 22.42   | 0.144                                   | 28.24   | 22.58   |
| 0.512            | 28.60                                    | 22.36   | 0.211                                   | 27.86   | 22.48   |
| 0.837            | 26.59                                    | 22.06   | 0.310                                   | 27.72   | 22.06   |
| 1.37             | 24.11                                    | 20.47   | 0.453                                   | 27.31   | 21.61   |
| 2.24             | 22.51                                    | 17.53   | 0.663                                   | 26.54   | 21.11   |
| 3.66             | 20.88                                    | 15.13   | 0.971                                   | 25.64   | 20.58   |
| 5.98             | 19.30                                    | 14.39   | 1.42                                    | 23.75   | 19.24   |
| 9.78             | 19.14                                    | 13.86   | 2.08                                    | 22.37   | 17.20   |
| 16.0             | 20.60                                    | 13.82   | 3.05                                    | 19.86   | 15.52   |
| 18.0             | 20.97                                    | 13.62   | 4.46                                    | 18.656  | 14.55   |
| 20.0             | 20.96                                    | 13.61   | 6.53                                    | 18.32   | 13.63   |
| 40.0             | 21.99                                    | 15.84   | 9.56                                    | 19.03   | 14.28   |
| 60.0             | 20.37                                    | 15.66   | 14.0                                    | 20.14   | 14.56   |
| 100              | 14.11                                    | 12.10   | 16.0                                    | 21.22   | 14.93   |
| 400              | 5.90                                     | 5.20    | 20.0                                    | 21.65   | 15.80   |
|                  |                                          |         | 30.0                                    | 23.50   | 17.16   |
|                  |                                          |         | 40.0                                    | 23.08   | 17.03   |
|                  |                                          |         | 60.0                                    | 21.34   | 15.87   |
|                  |                                          |         | 100                                     | 16.11   | 12.84   |
|                  |                                          |         | 400                                     | 6.24    | 5.76    |

Table S6.  $^1\text{H}$  NMR relaxivities of  $(\text{GdL})_6\text{-}\alpha\text{-CD}$  and  $(\text{GdL})_7\text{-}\beta\text{-CD}$  measured at clinical fields (1.5 and 3.0 T) compared with values predicted by analysis of  $^1\text{H}$  NMRD profile (*in italics*). Values of relaxivity are suggested to be loaded by ESD's of approximately  $\pm 1 \text{ s}^{-1} \text{mM}^{-1}$  due to range of averaged voxels, and principal error in ensuring temperature stability.

| $B / \text{T}$ | $B / \text{MHz}$ | $r_1 / \text{s}^{-1} \text{mM}^{-1}$     |                     |                                         |                     |
|----------------|------------------|------------------------------------------|---------------------|-----------------------------------------|---------------------|
|                |                  | $(\text{GdL})_6\text{-}\alpha\text{-CD}$ |                     | $(\text{GdL})_7\text{-}\beta\text{-CD}$ |                     |
|                |                  | 298.2 K                                  | 310.2 K             | 298.2 K                                 | 310.2 K             |
| 1.5            | 63.9             | 17.8( <i>18.8</i> )                      | 15.3( <i>14.8</i> ) | 19.8( <i>20.2</i> )                     | 14.2( <i>15.9</i> ) |
| 3.0            | 128.8            | 13.2( <i>12.6</i> )                      | 12.5( <i>11.3</i> ) | 12.6( <i>13.7</i> )                     | 12.7( <i>12.3</i> ) |

## // Simultaneous fit of 1H NMRD and 17O T1, T2 and dwr NMR data // Molecular tumbling modelled by Lipari-Szabo approach

IndVars: T,B  
DepVars: R1H,lnT1Or,lnT2Or,dwr  
// All possible parameters:  
// tv0,Ev,delta,dg,n,tm0,Hm,tr0l,tr0IH,tr0g,Erl,ErlH,Erg,RLS,ro,rh,rhos,acc,khi,Cout,nss,tm0ss,Hmss  
// It is necessary to choice in maximum 20 of them, otherwise Scientist breaks  
Params: tv0,Ev,delta,n,tm0,Hm,tr0l,tr0g,Erl,Erg,RLS,ro,rh,rhos,acc,khi,Cout,nss,tm0ss,Hmss

### // Notes

// temperature is in Kelvins  
// magnetic field is in Larmor frequencies  
// relaxivities and shifts are given per milimolar solution  
// "ln" means natural logarithm  
// Pm is molar fraction of coordinated water,  $Pm = q \cdot c(\text{Gd}) / 55.56$   
//  
// reduced times T1,2Or are calculated by:  
//  $T1,2Or = (1/Pm) \cdot (1/T1,2O(\text{Gd-sample})) - 1/T1,2O(\text{blank})$   
//  
// reduced frequencies (shifts) dwr are calculated by:  
//  $dwr = B \cdot 10^{-6} \cdot (2 \cdot \pi / c(\text{Gd})) \cdot \{[\text{shift}(\text{O}, \text{Gd-sample}) - \text{shift}(\text{O}, \text{blank})] - [\text{shift}(\text{H}, \text{Gd-sample}) - \text{shift}(\text{H}, \text{blank})]\}$   
// where B is in MHz, c(Gd) is in mM and shifts are in ppm  
// alternatively  
//  $dwr = (2 \cdot \pi / c(\text{Gd})) \cdot \{[\text{shift}(\text{O}, \text{Gd-sample}) - \text{shift}(\text{O}, \text{blank})] - (g_0/g_H) \cdot [\text{shift}(\text{H}, \text{Gd-sample}) - \text{shift}(\text{H}, \text{blank})]\}$   
// where shifts are in Hz  
// be careful, somebody is fitting using frequency wr calculated by  
//  $wr = B \cdot (2 \cdot \pi / Pm) \cdot \{[\text{shift}(\text{H}, \text{Gd-sample}) - \text{shift}(\text{H}, \text{blank})] - [\text{shift}(\text{O}, \text{Gd-sample}) - \text{shift}(\text{O}, \text{blank})]\}$   
// (here, shifts are in ppm scale)  
// which can be transferred to dwr by  
//  $dwr = wr \cdot 10^{-3} / 55.56$

### // Parameters and variables used

// T - temperature [K]  
// B - used field [MHz for 1H]  
// R1H - 1H longitudinal relaxivity [ $\text{ms}^{-1} \text{mM}^{-1}$ ]  
// R1O - 17O longitudinal relaxivity [ $\text{ms}^{-1} \text{mM}^{-1}$ ]  
// R2O - 17O transversal relaxivity [ $\text{ms}^{-1} \text{mM}^{-1}$ ]  
// n - number of water molecules coordinated at Gd  
// tm0 - water residence time at 298 K [s]  
// tm0ss - water residence time at 298 K for second sphere [s]  
// tr0l - local rotation correlation time of Gd-O vector at 298 K [s]  
// tr0IH - local rotation correlation time of Gd-H vector at 298 K [s]  
// tr0g - global rotation correlation time at 298 K [s]  
// trss - rotation correlation time of second sphere [s]  
// tv0 - correlation time for instantaneous distortion of the metal coordination polyhedron at 298 K [s]  
// dwr - 17O reduced radial frequency difference of bonded and free water [ $\text{rad s}^{-1}$ ]  
// delta -  $\Delta^2$ , mean squared fluctuation of ZFS  
// Erl - rotation free energy (local motion) [ $\text{kJ mol}^{-1}$ ]  
// Erg - rotation free energy (global motion) [ $\text{kJ mol}^{-1}$ ]  
// Hm - water exchange free energy [ $\text{kJ mol}^{-1}$ ]  
// acc - hyperfine Gd-O coupling constant  $A/\hbar$   
// ro - Gd-O distance [m]  
// rh - Gd-H distance [m]  
// rhos - shortest Gd-H distance from outer sphere to Gd [m]  
// RLS - degree of spatial restriction of the local motion  
// D0 - diffusion coefficient at 298 K  
// khi - term with quadrupolar coupling constant and asymmetry parameter =  $\chi^* (1 + (\eta^2)/3)^{0.5}$   
// Cout - outer sphere contribution to 17O NMR shift  
// nss - number of water molecules at second sphere



// rss - Gd-ss distance; sometime simplified that rss=a  
// Hmss - water exchange free energy for second sphere contribution

**// Physical constants implicitly used**

// p - Ludolf's number ( $\pi = 3.14159265$ )  
// univ - universal gas constant ( $R = 8.31441 \text{ J mol}^{-1} \text{ K}^{-1}$ )  
// gh - gyromagnetic ratio of  $^1\text{H}$  ( $\gamma_{\text{H}} = 2.675\text{E}8 \text{ rad s}^{-1} \text{ T}^{-1}$ )  
// go - gyromagnetic ratio of  $^{17}\text{O}$  ( $\gamma_{\text{O}} = -3.626\text{E}7 \text{ rad s}^{-1} \text{ T}^{-1}$ )  
// gs - electronic gyromagnetic ratio ( $\gamma_{\text{S}} = 1.75977\text{E}11 \text{ rad s}^{-1} \text{ T}^{-1}$ )  
// S - multiplicity of Gd ( $S = 3.5$ )  
// Sz - spin z projection ( $S_z = 2*S*(S+1) = 31.5$ )  
// mB - Bohr magneton ( $\mu_{\text{B}} = 9.274\text{E}-24 \text{ J T}^{-1}$ )  
// m0 - vacuum magnetic susceptibility ( $\mu_0 = 4\pi\text{E}-7$ )  
// h - Planck constant ( $h = 6.626071\text{E}-34 \text{ J s}$ )  
// hbar - reduced Planck constant ( $\hbar/(2*\pi) = 1.0546\text{E}-34 \text{ J s rad}^{-1}$ )  
// NA - Avogadro constant ( $NA = 6.023\text{E}23 \text{ mol}^{-1}$ )  
// k - Boltzmann constant ( $k_{\text{B}} = 1.38066\text{E}-23 \text{ J K}^{-1}$ )  
// g - electron g-factor ( $g = 2.0023193043622$ )

// C1 =  $(1/25)*(4*S*(S+1)-3)$   
// C2 =  $(1/50)*(4*S*(S+1)-3)$   
// C3 =  $(1/3)*S*(S+1)$   
// C4 =  $(1/15)*go^2*g^2*mB^2*(m0/(4*p))^2*S*(S+1)$   
// C5 =  $(1/5)*(m0/(4*p))^2*(meff^4*mB^4)/(3*k)^2$   
// C6 =  $2*S*(S+1)*mB/(3*k)*1\text{E}6*2*p/gh$   
// C7 =  $(2/15)*go^2*g^2*mB^2*(m0/(4*p))^2*S*(S+1)$   
// C8 =  $((3*p^2)/10)*((2l+3)/(l^2(2l-1)))$ ;  $l=5/2$   
// C9 =  $(2/15)*((gh^2*g^2*mB^2)*S*(S+1)*(m0/(4*p))^2$   
// C10 =  $((32*NA*p)/405)*(m0/(4*p))^2*\hbar^2*gs^2*gh^2*S(S+1)$

**// Definitions of constants**

p=3.14159265  
univ=8.31441  
gh=2.675E8  
go=-3.626E7  
gs=1.75977E11  
C1=2.4  
C2=1.2  
C3=5.25  
C4=4.7604E-45  
C5=3.4274E-59  
C6=0.1657  
C7=9.5209E-45  
C8=0.9475  
C9=5.181644E-43  
C10=5.796E-19

**// Calculation of diffusion coefficient (D)**

// Hindman alternative

B1=3.118150E-04  
B2=5.062560E+03  
B3=1.547920E+02  
B4=1.629310E+03  
 $D=(1\text{E}-4)/((B1*\text{EXP}(B2/T))+(B3*\text{EXP}(B4/T)))$

// Alternative using activation theory

//D0=25E-10 m<sup>2</sup> s<sup>-1</sup>  
//ED=22 kJ mol<sup>-1</sup>  
//D0=25E-10  
//ED=22E3  
 $D=D0*\exp((ED/univ)*((1/298.15)-(1/T)))$

**// Definition of molar fraction of coordinated water molecules**

$$P_m = n \cdot 10^{-3} / 55.55$$

**// Definition of Larmor (angular) frequencies of 1H (wh), 17O (wo) and electron (ws)**

$$w_h = 2 \cdot \pi \cdot 10^6 \cdot B$$

$$w_o = 2 \cdot \pi \cdot 10^6 \cdot B \cdot (g_o / g_h)$$

$$w_s = 2 \cdot \pi \cdot 10^6 \cdot B \cdot (g_s / g_h)$$

**// Eyring equations**

$$t_m = (t_{m0} \cdot 298.15 / T) \cdot \exp(-H_m / \text{univ} \cdot ((1/298.15) - (1/T)))$$

$$t_{mss} = (t_{m0ss} \cdot 298.15 / T) \cdot \exp(-H_{mss} / \text{univ} \cdot ((1/298.15) - (1/T)))$$

$$t_{rl} = t_{rl0} \cdot \exp(-E_{rl} / \text{univ} \cdot ((1/298.15) - (1/T)))$$

$$// t_{rlH} = t_{rl0H} \cdot \exp(-E_{rlH} / \text{univ} \cdot ((1/298.15) - (1/T)))$$

$$t_{rg} = t_{rg0} \cdot \exp(-E_{rg} / \text{univ} \cdot ((1/298.15) - (1/T)))$$

$$t_v = t_{v0} \cdot \exp(-E_v / \text{univ} \cdot ((1/298.15) - (1/T)))$$

**// Electronic relaxation times T1e, T2e**

*// Alternative taking into account only zero field splitting (ZFS)*

*// McLachlan theory*

$$T_{1e} = (C_1 \cdot \delta \cdot t_v \cdot ((1/(1 + w_s^2 \cdot t_v^2)) + (4/(1 + 4 \cdot w_s^2 \cdot t_v^2))))^{-1}$$

$$// T_{2e} = (C_2 \cdot \delta \cdot t_v \cdot (3 + (5/(1 + w_s^2 \cdot t_v^2)) + (2/(1 + 4 \cdot w_s^2 \cdot t_v^2))))^{-1}$$

*// Powell alternative*

$$T_{2e} = (\delta \cdot t_v \cdot ((5.26/(1 + 0.372 \cdot w_s^2 \cdot t_v^2)) + (7.18/(1 + 1.24 \cdot w_s \cdot t_v))))^{-1}$$

*// Alternative including spin rotation (SR) term using local rotational time*

$$// T_{1e} = (C_1 \cdot \delta \cdot t_v \cdot ((1/(1 + w_s^2 \cdot t_v^2)) + (4/(1 + 4 \cdot w_s^2 \cdot t_v^2)) + (d_g/(9 \cdot t_{rl}))))^{-1}$$

$$// T_{2e} = (C_2 \cdot \delta \cdot t_v \cdot (3 + (5/(1 + w_s^2 \cdot t_v^2)) + (2/(1 + 4 \cdot w_s^2 \cdot t_v^2)) + (d_g/(9 \cdot t_{rl}))))^{-1}$$

$$// T_{2e} = (\delta \cdot t_v \cdot ((5.26/(1 + (0.372 \cdot w_s^2 \cdot t_v^2))) + (7.18/(1 + 1.24 \cdot w_s \cdot t_v)) + (d_g/(9 \cdot t_{rl}))))^{-1}$$

**// Correlation times (t - total, l - local, g - global, e - electronic)**

*// Dunand suggestion for t\_{rlH}/t\_{rl} ratio*

$$// t_{rlH} = t_{rl} \cdot 0.65$$

*// when t\_{rlH} and t\_{rl} are the same*

$$t_{rlH} = t_{rl}$$

$$t_{rt} = (t_{rl}^{-1} + t_{rg}^{-1})^{-1}$$

$$t_{rtH} = (t_{rlH}^{-1} + t_{rg}^{-1})^{-1}$$

$$t_{c1l} = (T_{1e}^{-1} + t_{rt}^{-1} + t_m^{-1})^{-1}$$

$$t_{c2l} = (T_{2e}^{-1} + t_{rt}^{-1} + t_m^{-1})^{-1}$$

$$t_{c1lH} = (T_{1e}^{-1} + t_{rtH}^{-1} + t_m^{-1})^{-1}$$

$$t_{c2lH} = (T_{2e}^{-1} + t_{rtH}^{-1} + t_m^{-1})^{-1}$$

$$t_{c1g} = (T_{1e}^{-1} + t_{rg}^{-1} + t_m^{-1})^{-1}$$

$$t_{c2g} = (T_{2e}^{-1} + t_{rg}^{-1} + t_m^{-1})^{-1}$$

$$t_{e1} = (T_{1e}^{-1} + t_m^{-1})^{-1}$$

$$t_{e2} = (T_{2e}^{-1} + t_m^{-1})^{-1}$$

**// Radial frequency difference of bound and free water [rad s<sup>-1</sup>] (dwm)**

$$dwm = (C_6 / T) \cdot \text{acc} \cdot B$$

**// Spectral density functions for Lipari-Szabo approach**

$$d_{1O} = (RLS \cdot t_{c1g} / (1 + w_o^2 \cdot t_{c1g}^2)) + ((1 - RLS) \cdot t_{c1l} / (1 + w_o^2 \cdot t_{c1l}^2))$$

$$d_{2O} = (RLS \cdot t_{c2g} / (1 + w_s^2 \cdot t_{c2g}^2)) + ((1 - RLS) \cdot t_{c2l} / (1 + w_s^2 \cdot t_{c2l}^2))$$

$$q_{1O} = (RLS \cdot t_{rg} / (1 + w_o^2 \cdot t_{rg}^2)) + ((1 - RLS) \cdot t_{rt} / (1 + w_o^2 \cdot t_{rt}^2))$$

$$q_{2O} = (RLS \cdot t_{rg} / (1 + 4 \cdot w_o^2 \cdot t_{rg}^2)) + ((1 - RLS) \cdot t_{rt} / (1 + 4 \cdot w_o^2 \cdot t_{rt}^2))$$

$$// d_{1H} = (RLS \cdot t_{c1g} / (1 + w_h^2 \cdot t_{c1g}^2)) + ((1 - RLS) \cdot t_{c1l} / (1 + w_h^2 \cdot t_{c1l}^2))$$

$$// d_{2H} = (RLS \cdot t_{c2g} / (1 + w_s^2 \cdot t_{c2g}^2)) + ((1 - RLS) \cdot t_{c2l} / (1 + w_s^2 \cdot t_{c2l}^2))$$

$$d_{1H} = (RLS \cdot t_{c1g} / (1 + w_h^2 \cdot t_{c1g}^2)) + ((1 - RLS) \cdot t_{c1lH} / (1 + w_h^2 \cdot t_{c1lH}^2))$$

$$d_{2H} = (RLS \cdot t_{c2g} / (1 + w_s^2 \cdot t_{c2g}^2)) + ((1 - RLS) \cdot t_{c2lH} / (1 + w_s^2 \cdot t_{c2lH}^2))$$

```
// ***** 17O longitudinal relaxation *****  
//  
// R1 dipolar (pseudocontact) contribution for 17O according to Lipari-Szabo (R1dO)  
R1dO=(C7/(ro^6))*(3*d1O+7*d2O)  
//  
// R1 quadrupolar contribution for 17O according to Lipari-Szabo (R1qO)  
R1qO=C8*khi^2*(0.2*q1O+0.8*q2O)  
//  
// Total T1 relaxation rate/time (R1mO/T1mO)  
R1mO=R1dO+R1qO  
T1mO=(R1mO)^(-1)  
//  
// Overall reduced T1 relaxation of 17O (R1O)  
lnT1Or=ln(1/(T1mO+tm))  
R1O=Pm/(T1mO+tm)  
  
// ***** 17O transversal relaxation *****  
//  
// R2 scalar (contact) contribution for 17O (R2sO)  
R2sO=C3*acc^2*(te1+(te2/(1+ws^2*te2^2)))  
//  
// R2 dipolar (pseudocontact) contribution for 17O according to Lipari-Szabo (R2dO)  
R2dO=(C4/(ro^6))*(7*d1O+13*d2O)  
//  
// R2 dipolar (pseudocontact) Curie contribution for 17O (R2cO)  
//R2cO=(C5*wo^2/(T^2*ro^6))*(4*trg+3*trg/(1+wo^2*trg^2))  
//  
// Total T2 relaxation rate/time (R2mO/T2mO)  
//R2mO=R2sO+R2dO+R2cO  
R2mO=R2sO+R2dO  
//R2mO=R2sO  
T2mO=(R2mO)^(-1)  
//  
// Overall reduced T2 relaxation of 17O (R2O)  
num=(T2mO^(-2))+((T2mO*tm)^(-1)+dwm^2)  
denom=(tm^(-1)+T2mO^(-1))^2+dwm^2  
fract=num/denom  
lnT2Or=ln(fract/tm)  
R2O=Pm*fract/tm  
  
// ***** 17O chemical shift *****  
//  
// Contribution of os (dwos) and total reduced frequency (dwr)  
dwos=Cout*dwm  
dwr=Pm*(dwm/((tm/T2mO+1)^2+(tm*dwm)^2)+dwos)  
  
// ***** 1H longitudinal relaxation *****  
//  
// R1 inner sphere dipolar (pseudocontact) contribution for 1H according to Lipari-Szabo  
// (R1dH, R1His)  
R1dH=(C9/(rh^6))*(3*d1H+7*d2H)  
T1mH=(R1dH)^(-1)  
R1His=Pm/(T1mH+tm)  
//  
// R1 outer sphere contribution for 1H according to Freed (R1Hos);  
// i - 1H nucleus, s - Gd3+ electron  
tau=rhos^2/D
```

```
z2i=(tau/T1e)+([0,1]*wh*tau)
z2s=(tau/T2e)+([0,1]*ws*tau)
os1=Re((1+0.25*(z2i^0.5))/(1+z2i^0.5+(4/9)*z2i+(1/9)*(z2i^1.5)))
os2=Re((1+0.25*(z2s^0.5))/(1+z2s^0.5+(4/9)*z2s+(1/9)*(z2s^1.5)))
R1Hos=(C10/(rhos*D))*(3*os1+7*os2)
//
// R1 second sphere dipolar contribution for 1H (R1Hss)
tc1ss=(T1e^(-1)+trss^(-1))^(-1)
tc2ss=(T2e^(-1)+trss^(-1))^(-1)
R1dHss=(C9/(rhos^6))*((3*tc1ss/(1+wh^2*tc1ss^2))+(7*tc2ss/(1+ws^2*tc2ss^2)))
T1mss=R1dHss^(-1)
Pmss=nss*1E-3/55.55
R1Hss=Pmss/(T1mss+tmss)
//
// Overall R1 proton relaxivity (R1H)
//R1H=R1His+R1Hos+R1Hss
R1H=R1His+R1Hos

// Estimation of parameters
//tv0,Ev,delta,dg,n,tm0,Hm,tr0l,tr0IH,tr0g,Erl,ErlH,Erg,RLS,ro,rh,a,acc,khi,Cout,nss,tm0ss,Hmss
tv0=9.08E-12
Ev=1000
delta=0.0509E20
dg=0.11
n=1
tm0=1.25E-8
Hm=45E3
tr0l=220E-12
//tr0IH=220E-12
tr0g=1950E-12
Erl=22E3
//ErlH=22E3
Erg=22E3
RLS=0.37
ro=2.5E-10
rh=3.1E-10
rhos=3.5E-10
acc=-3.18E6
khi=7.58E6
Cout=0.0
nss=0
tm0ss=1E-9
Hmss=10E3
trss=1E-10
```

## References

- 
- [1] A. Beeby, I. M. Clarkson, R. S. Dickins, S. Faulkner, D. Parker, L. Royle, A. S. de Sousa, J. A. G. Williams, M. Woods, *J. Chem. Soc., Perkin Trans. 2* **1999**, 493–503.
- [2] W. D. Horrocks, D. R. Sudnick, *J. Am. Chem. Soc.* **1979**, *101*, 334–340.
